# Supplementary material for: BioBits™ Explorer: A modular synthetic biology education kit
Source: PubMed Central journal article supplement — Sci Adv. 2018 Aug 1;4(8):eaat5105. doi: 10.1126/sciadv.aat5105 (PMC6070312; doi:10.1126/sciadv.aat5105), 2018-08-01
Supplement: aat5105_SM.pdf [file aat5105_SM.pdf]

## Supplementary Materials for

### **BioBits™ Explorer: A modular synthetic biology education kit**

Ally Huang, Peter Q. Nguyen, Jessica C. Stark, Melissa K. Takahashi, Nina Donghia, Tom Ferrante, Aaron J. Dy, Karen J. Hsu, Rachel S. Dubner, Keith Pardee, Michael C. Jewett\*, James J. Collins\*

\*Corresponding author. Email: jimjc@mit.edu (J.J.C.); m-jewett@northwestern.edu (M.C.J.)

Published 1 August 2018, *Sci. Adv.* **4**, eaat5105 (2018)  
DOI: 10.1126/sciadv.aat5105

#### **This PDF file includes:**

- Fig. S1. Quantification of all proteins expressed in FD-CF.
- Fig. S2. Fluorescent proteins expressed in the PURE and crude extract systems.
- Fig. S3. Quantitative analysis of fluorescent proteins.
- Fig. S4. Representative scanning electron microscopy images of hydrogel ultrastructures generated with FD-CF enzymes.
- Fig. S5. Schematic of RPA reaction.
- Fig. S6. Detailed steps for isolating genomic DNA from fruits for environmental sensing activity.
- Table S1. Library of proteins and toehold switches that enable visual, olfactory, and tactile outputs for educational engagement.
- Table S2. FD-CF reactions allow for inexpensive classroom synthetic biology education kits.

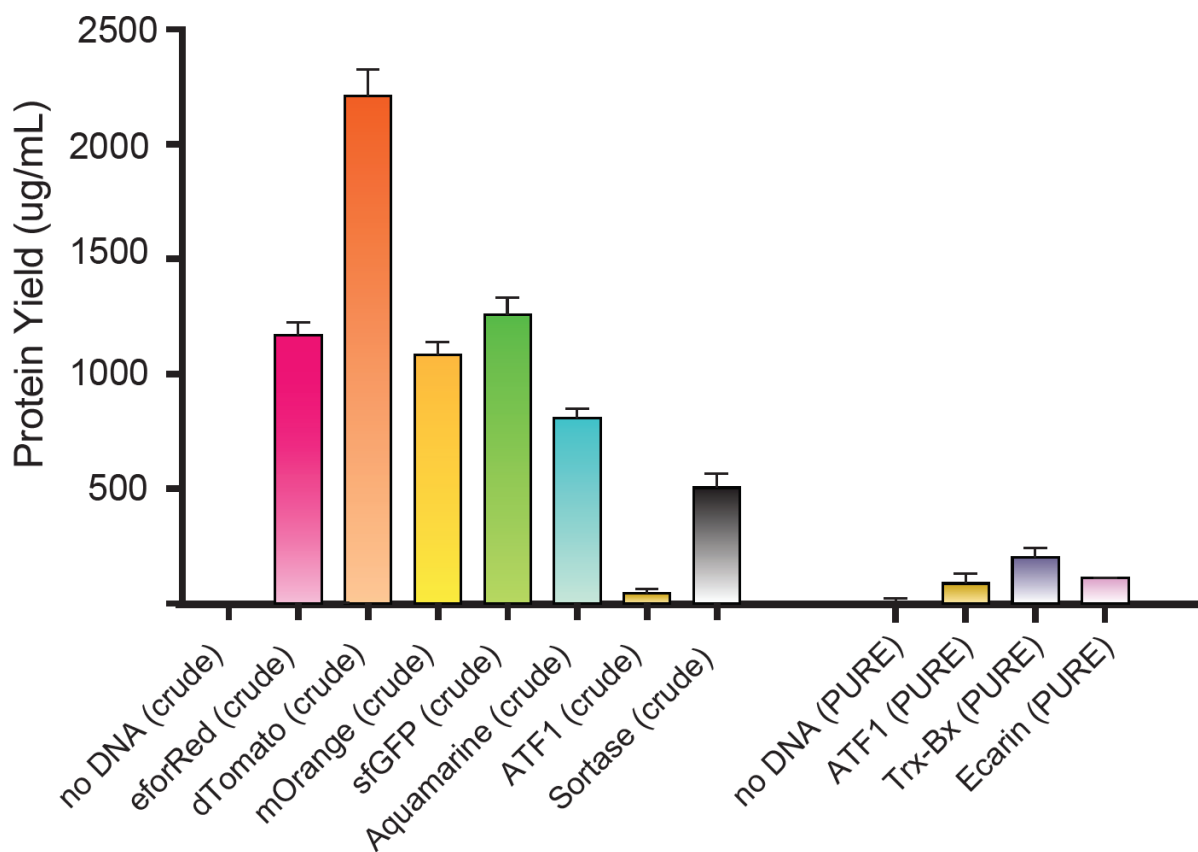

**Fig. S1. Quantification of all proteins expressed in FD-CF.** All of the FD-CF expressed proteins used in the demonstration experiments had high soluble yields (between 100 and >1000  $\mu\text{g/mL}$ ), as measured by  $^{14}\text{C}$ -Leucine incorporation. Values represent averages and error bars represent standard deviations of  $n=3$  biological replicates.

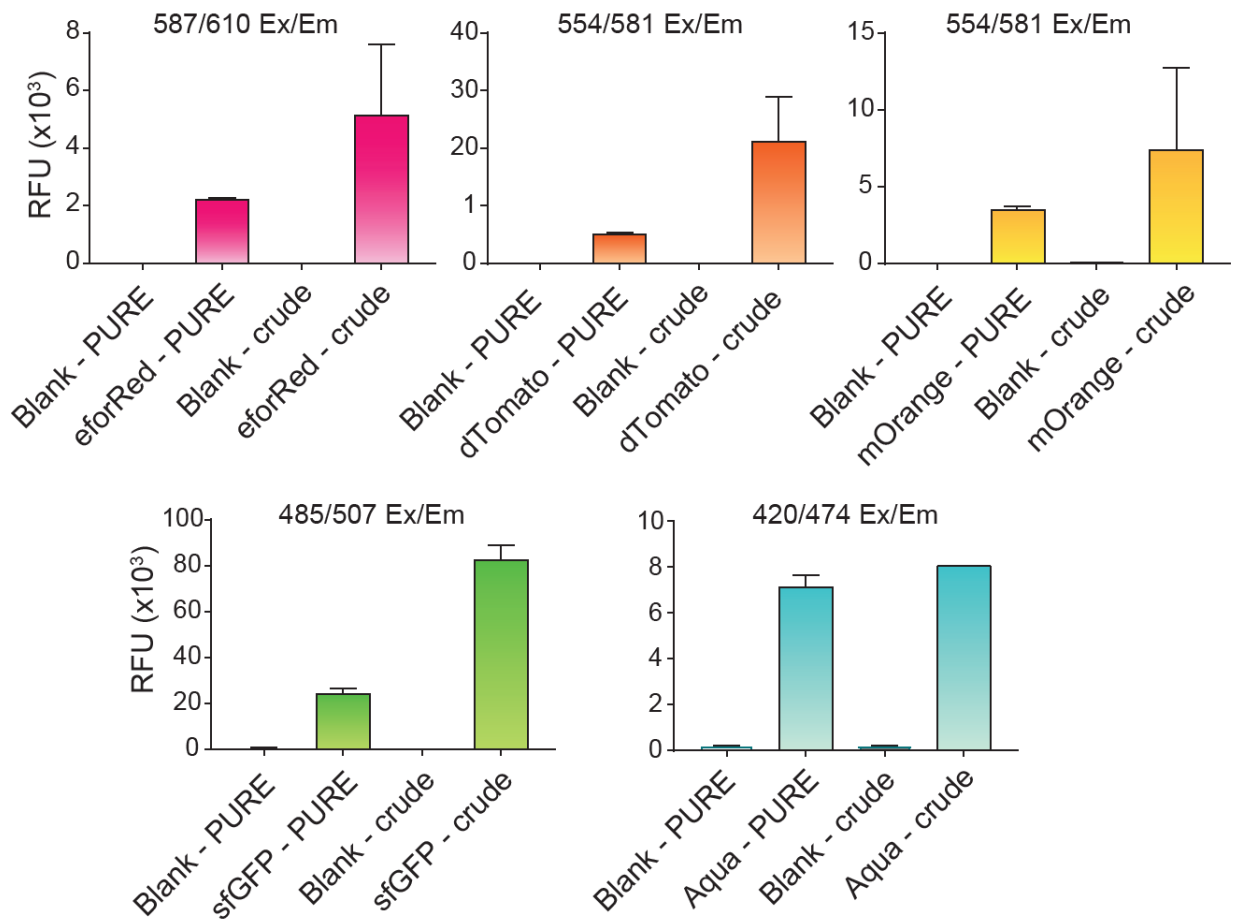

**Fig. S2. Fluorescent proteins expressed in the PURE and crude extract systems.** Endpoint fluorescent readouts of all expressed proteins in the commercial PURE or in-house crude system. Values represent averages and error bars represent average errors of  $n \geq 2$  biological replicates.

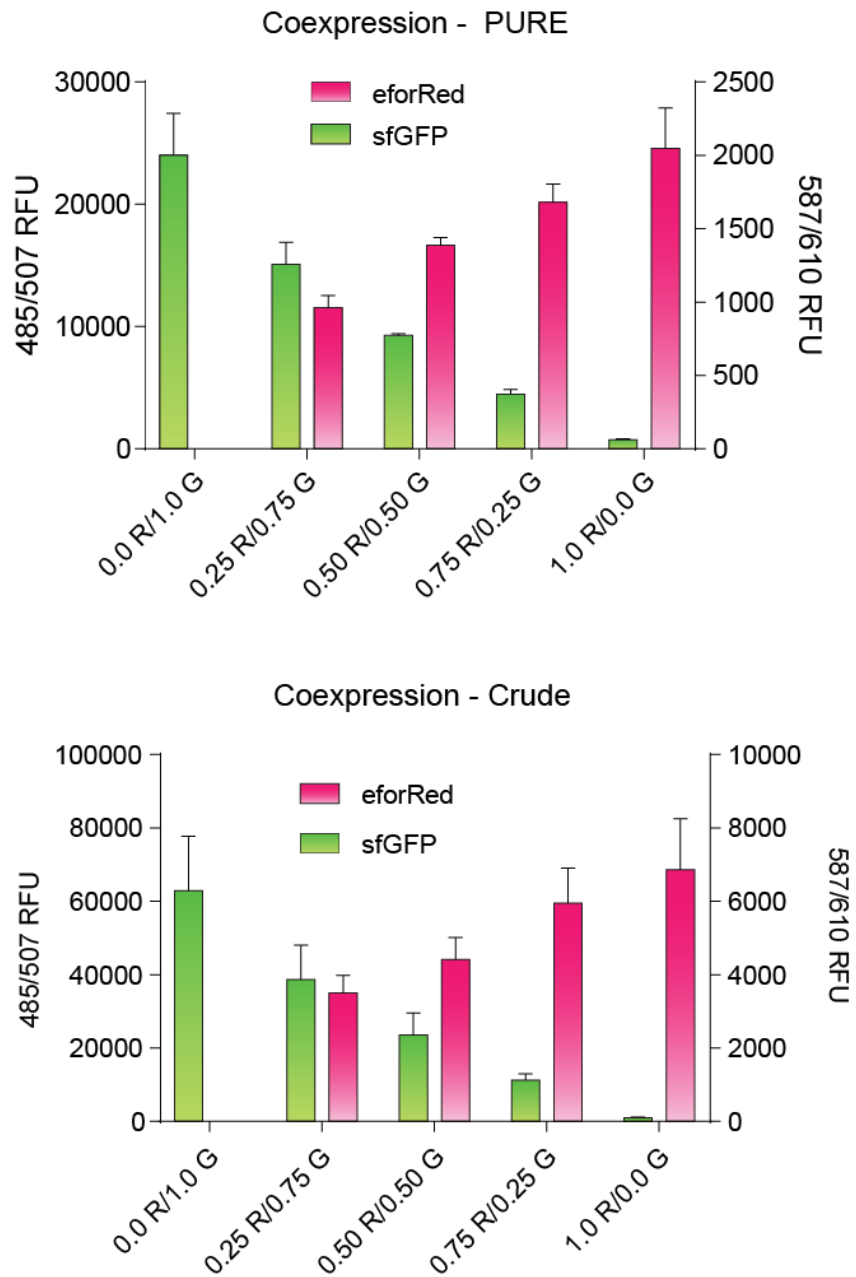

**Fig. S3. Quantitative analysis of fluorescent proteins.** Endpoint fluorescent readouts of co-expressed sfGFP and eforRed proteins in the PURE or crude extract system. Values represent averages and error bars represent standard deviations of n=3 biological replicates.

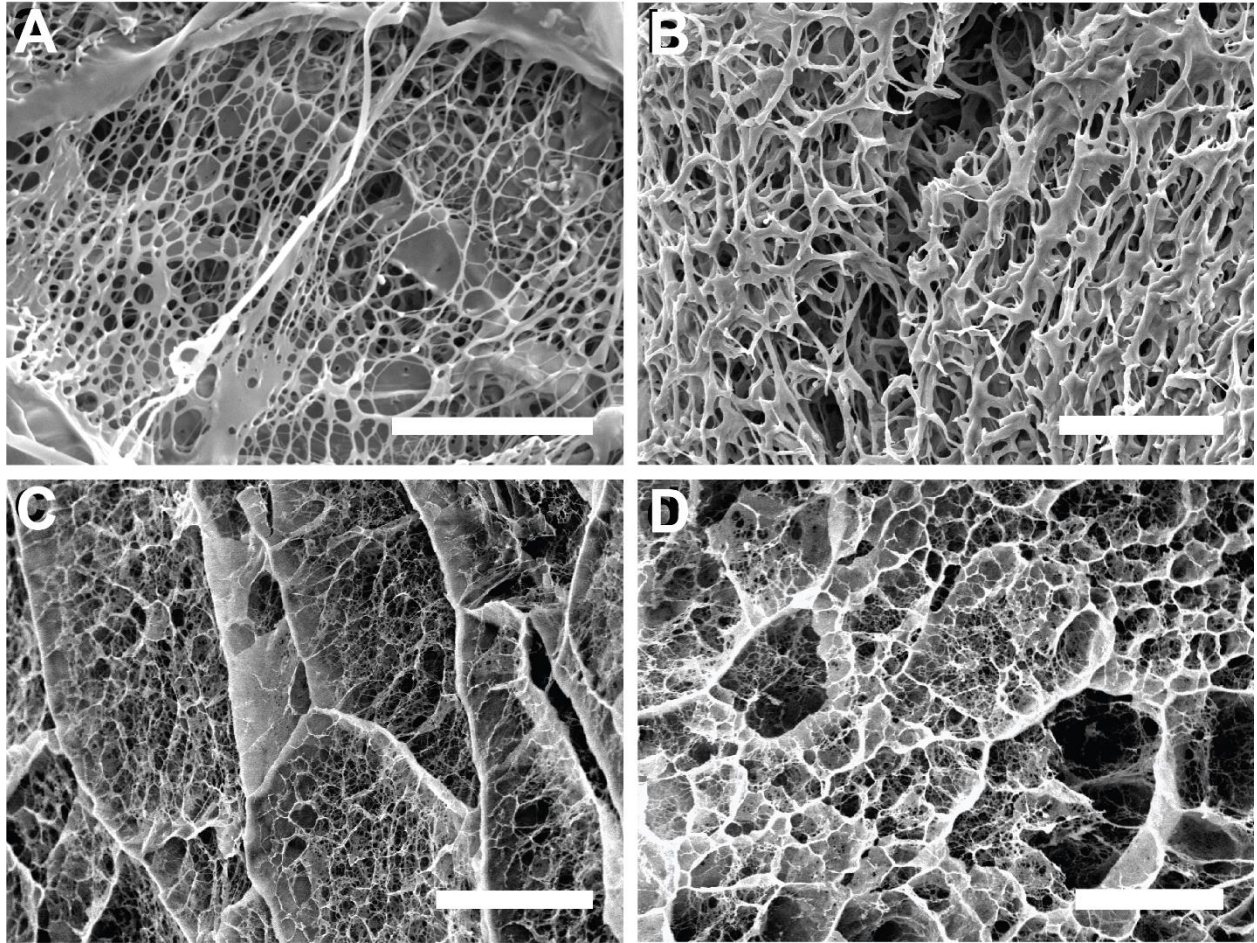

**Fig. S4. Representative scanning electron microscopy images of hydrogel ultrastructures generated with FD-CF enzymes.** PEG hydrogels crosslinked by FD-CF expressed sortase in (A) PURE and (B) crude extract. Fibrin hydrogels crosslinked by FD-CF expressed (C) ecarin in PURE and (D) batroxobin in PURE. All scale bars are 10 microns.

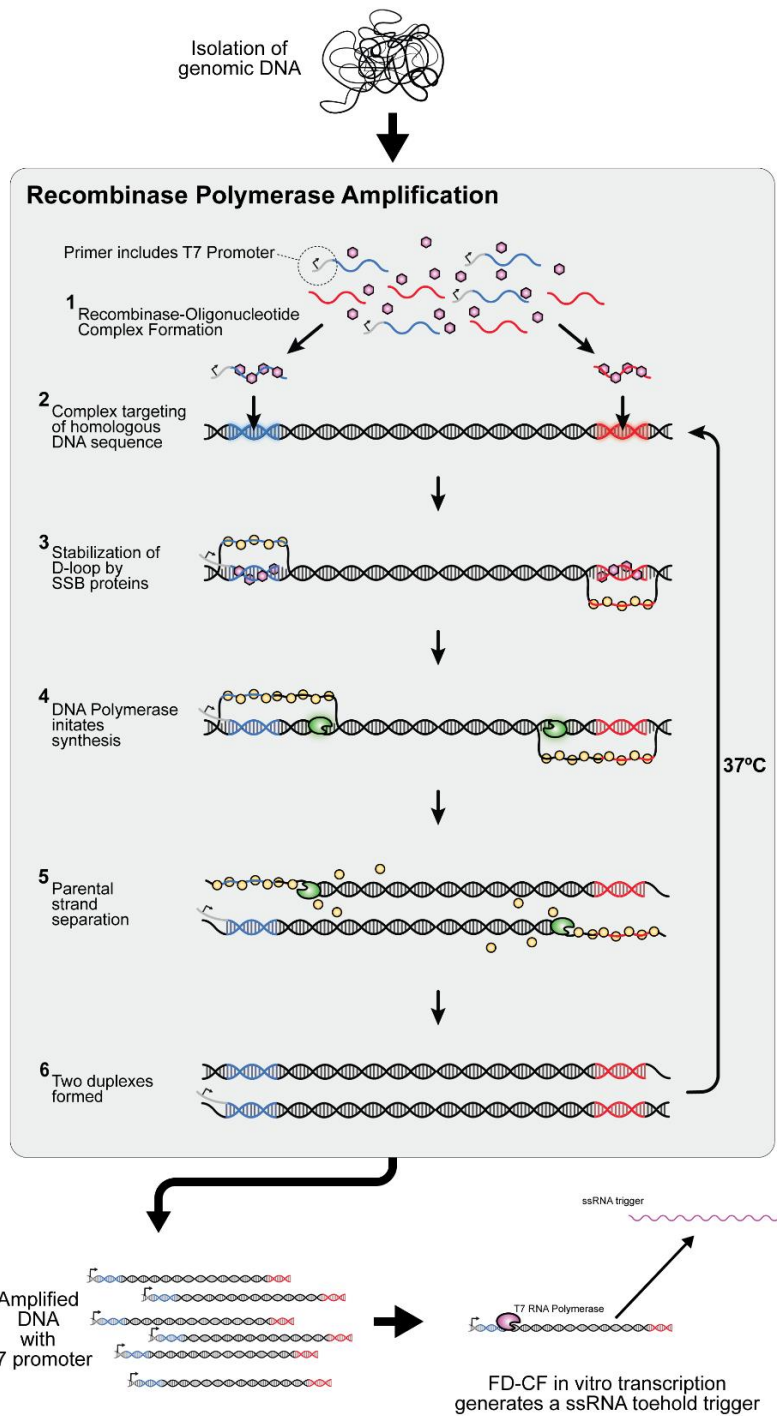

**Fig. S5. Schematic of RPA reaction.** From a genomic DNA sample, a specific region is isothermally amplified using Recombinase Polymerase Amplification. The primer includes a T7 promoter, such that the amplicons act as a template to generate a large amount of RNA trigger molecules when added to a FD-CF reaction. This results in signal amplification for toehold sensor activation.

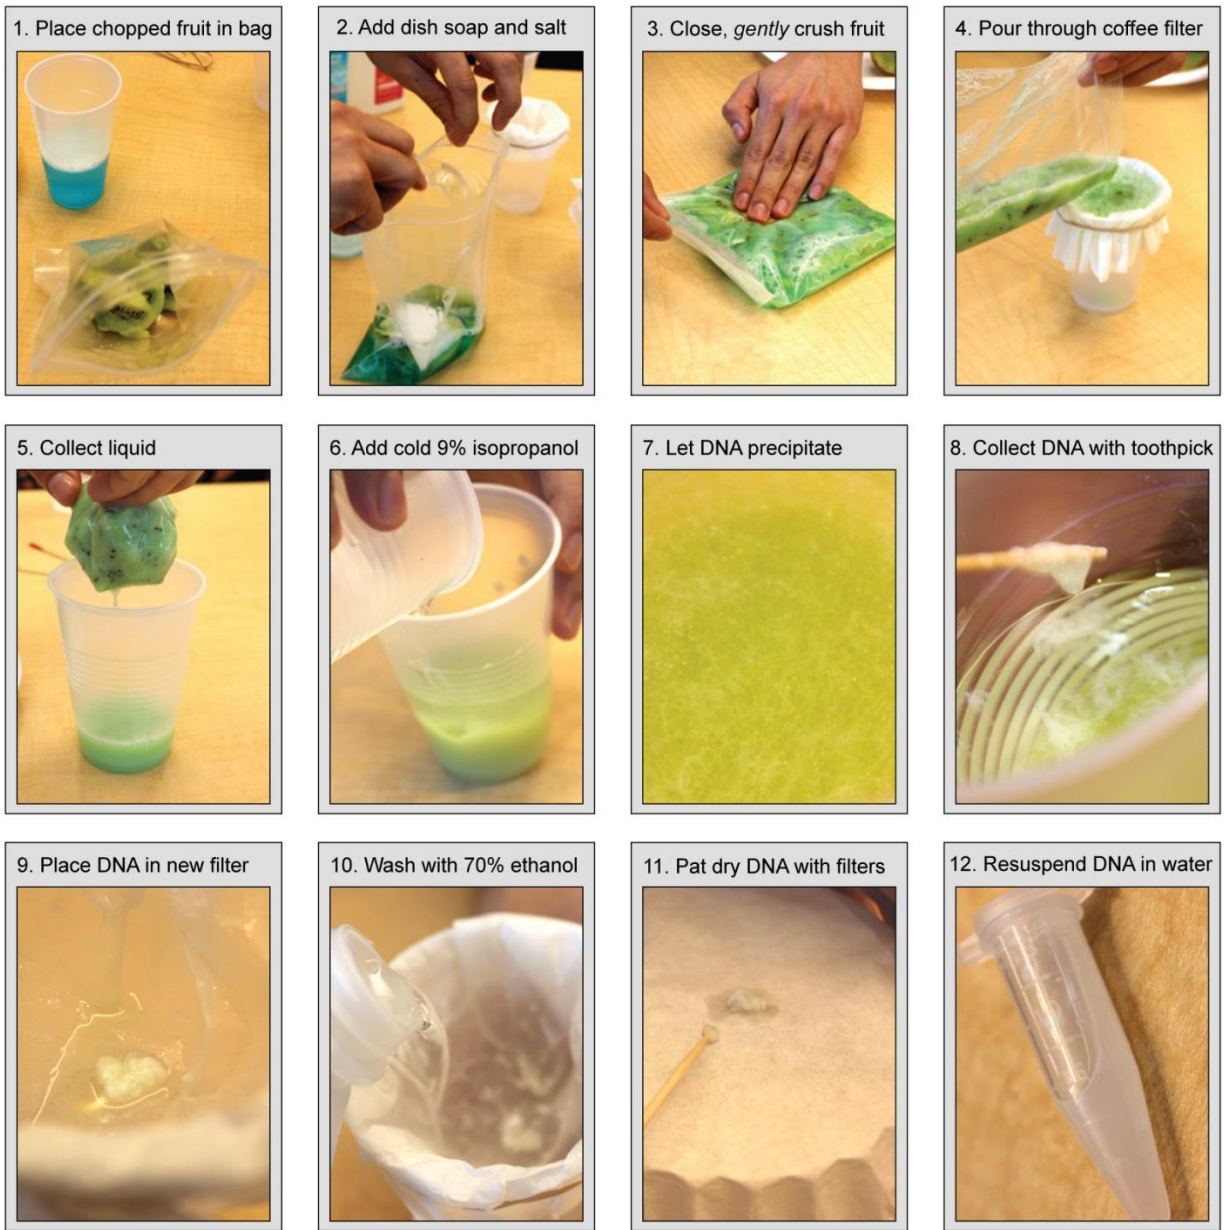

**Fig. S6. Detailed steps for isolating genomic DNA from fruits for environmental sensing activity.** Photographs showing the DNA extraction process from fruit.

**Table S1. Library of proteins and toehold switches that enable visual, olfactory, and tactile outputs for educational engagement.**

| <b>Protein</b>                  | <b>Output</b>                           | <b>Vector</b> | <b>Sequence Source</b>                                                 | <b>Addgene #</b> |
|---------------------------------|-----------------------------------------|---------------|------------------------------------------------------------------------|------------------|
| eforRed                         | <i>Visual/fluorescent red</i>           | pJL1          | iGEM part: BBa_K592012                                                 | 106320           |
| dTomato                         | <i>Visual/fluorescent orange</i>        | pJL1          | Addgene 54856                                                          | 102631           |
| mOrange                         | <i>Visual/fluorescent orange/yellow</i> | pJL1          | PDB entry: 2H5O                                                        | 102632           |
| sfGFP                           | <i>Visual/fluorescent green</i>         | pJL1          | PDB entry: 2B3P                                                        | 102634           |
| Aquamarine                      | <i>Fluorescent green/cyan</i>           | pJL1          | Addgene 42889                                                          | 106285           |
| ATF1                            | Banana smell                            | pJL1          | IGEM part: BBa_J45014                                                  | 106286           |
| Sortase                         | Tactile PEG-hydrogel                    | pJL1          | Gift from Linda Griffith                                               | 106288           |
| Ecarin                          | Tactile fibrin hydrogel                 | pNP1          | US Patent #US20050164365                                               | 106289           |
| Thioredoxin-Batroxobin (Trx-Bx) | Tactile fibrin hydrogel                 | pJL1          | Thioredoxin (Trx): Uniprot: P0AA25, Batroxobin (Bx): UniProt: P04971.1 | 106290           |

  

| <b>Toehold Switch</b>     | <b>Corresponding RPA Primers for Trigger(s)</b>                                                                | <b>Addgene #</b> |
|---------------------------|----------------------------------------------------------------------------------------------------------------|------------------|
| pCOLA banana sensor sfGFP | (Fwd)5'CATTCTAATACGACTCACTATAGGGATTATCTGCAAAA<br>AACTACGG3'<br><br>(Rev)5'TAAAAAGTGCTTCGGTGCAAAAATAAGAAACGAT3' | 107367           |
| pCOLA kiwi sensor sfGFP   | (Fwd)5'ACATTCTAATACGACTCACTATAGCCCCGTTTTTGGGT<br>GCTTGTGGT3'<br>(Rev)5'CGGGATTCTGCAATTCACACCAAGTATCGCAT3'      | 107368           |



**Table S2. FD-CF reactions allow for inexpensive classroom synthetic biology education kits.**

| <b>BioBits™ Explorer – Core Kit</b>                 | <b>Cost/rxn (\$)</b> | <b># Rxns</b>    | <b>Cost in kit (\$; w/ 10) repeats)</b> |
|-----------------------------------------------------|----------------------|------------------|-----------------------------------------|
| <b><i>Activity: Co-expressed fluorescent</i></b>    |                      |                  |                                         |
| Plasmids                                            | 0.04                 | 16               | 6.40                                    |
| CF reagents                                         | 0.10                 | 16               | 16.00                                   |
|                                                     |                      | <b>Sub-total</b> | <b>22.40</b>                            |
| <b><i>Activity: Odor-generating enzymes</i></b>     |                      |                  |                                         |
| Plasmids                                            | 0.04                 | 3                | 1.20                                    |
| CF reagents                                         | 0.10                 | 3                | 3.00                                    |
| Odor substrates                                     | 2.29                 | 3                | 68.70                                   |
|                                                     |                      | <b>Sub-total</b> | <b>72.90</b>                            |
| <b><i>Activity: Sortase-generated hydrogels</i></b> |                      |                  |                                         |
| Plasmids                                            | 0.07                 | 3                | 2.10                                    |
| CF reagents                                         | 0.21                 | 3                | 6.30                                    |
| Hydrogel substrates                                 | 2.34                 | 3                | 70.20                                   |
|                                                     |                      | <b>Sub-total</b> | <b>78.60</b>                            |
| <b><i>Reusable components</i></b>                   |                      |                  |                                         |
| 96-well incubator                                   |                      |                  | 20.00                                   |
| 8-well illuminator                                  |                      |                  | 15.00                                   |
| Nuclease-free water                                 |                      |                  | 1.00                                    |
|                                                     |                      | <b>Sub-total</b> | <b>36.00</b>                            |
| <b>Total:</b>                                       |                      |                  | <b>209.90</b>                           |

| <b>BioBits™ Explorer – Add-on Kit</b>     | <b>Cost/rxn (\$)</b> | <b># Rxns</b>    | <b>Cost in kit (\$; w/ 10) repeats)</b> |
|-------------------------------------------|----------------------|------------------|-----------------------------------------|
| DNA Extraction Supplies                   | 0.21                 | 4                | 8.40                                    |
| RPA reagents (1 rxn supplies whole class) | 4.27                 | 4                | 17.08                                   |
| CF reagents                               | 4.41                 | 4                | 176.40                                  |
|                                           |                      | <b>Sub-total</b> | <b>201.88</b>                           |
| <b>Total:</b>                             |                      |                  | <b>201.88</b>                           |
